# Supplementary material
Source: PubMed Central journal article supplement (PMC5763045)
Supplement: JB.00460-17_zjb003184635s1.pdf [file JB.00460-17_zjb003184635s1.pdf]

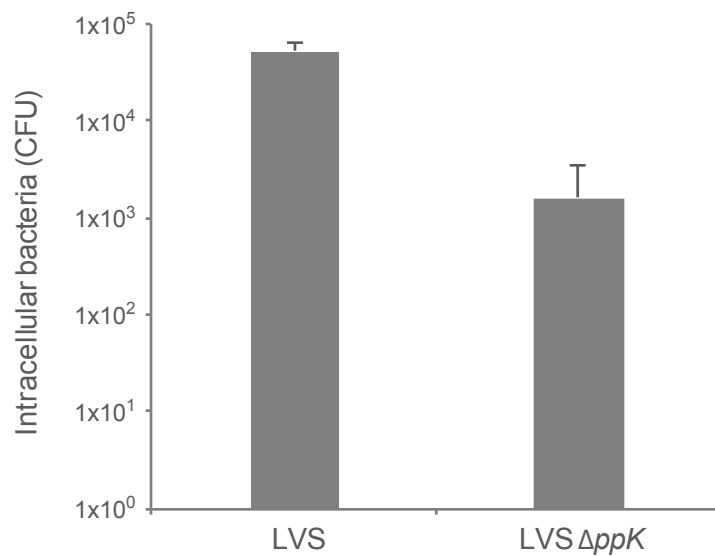

**Fig. S1.** PPK promotes the intramacrophage growth and survival of LVS. Growth and survival of wild-type LVS cells (LVS) and cells of the LVS  $\Delta ppk$  mutant strain (LVS  $\Delta ppk$ ) in J774 cells. J774 cells were infected with cells of the indicated strains at a multiplicity of infection of 5-10. 24 hours post-infection cells were lysed and bacteria were plated for enumeration. CFU stands for colony forming units.
